# Supplementary material for: The biomedical discourse relation bank
Source: Springer Nature journal article supplement (doi:10.1186/1471-2105-12-188), 2011-05-23
Supplement: 12859_2010_4610_MOESM1_ESM.pdf [file 12859_2010_4610_MOESM1_ESM.pdf]

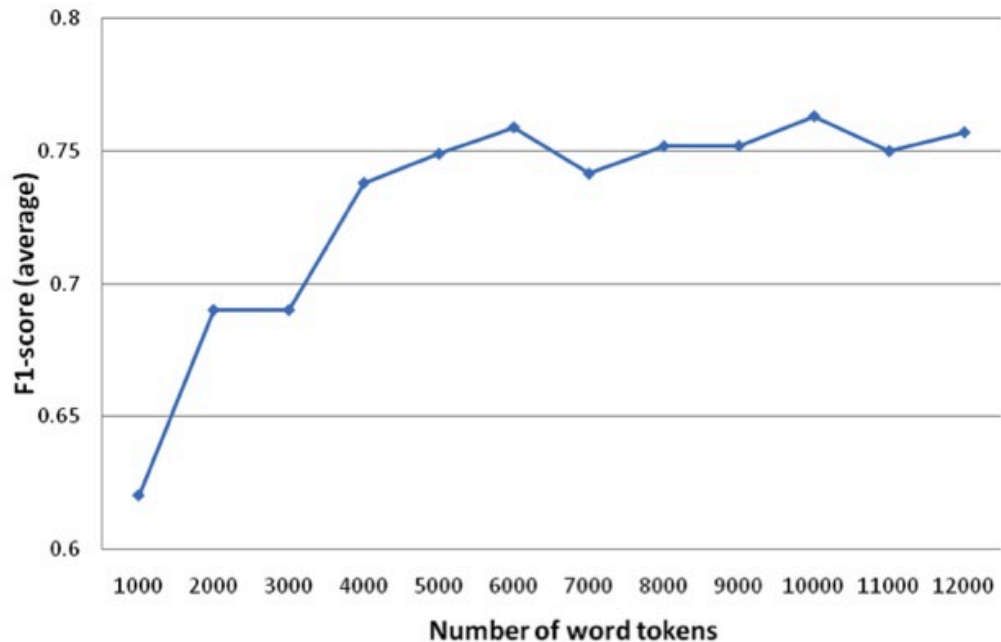

**Figure 1. CRF-based Discourse Connective Identification trained on different BioDRB Training Data Sizes**
